# Supplementary figures and images for: Structure of the kanamycin–calix[4]arene di-O-phosphonate salt
Source: Royal Society of Chemistry journal article supplement (doi:10.1039/b808568d), 2008-01-01

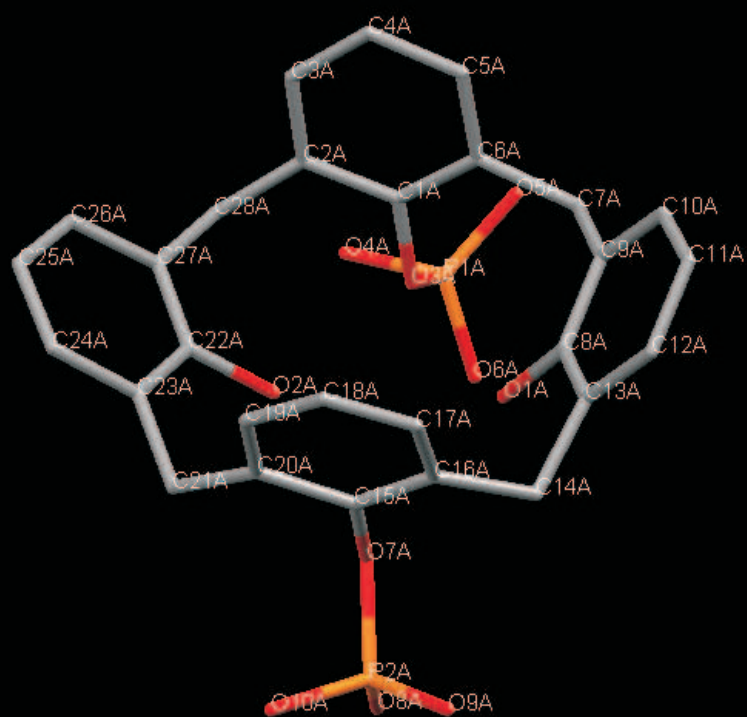

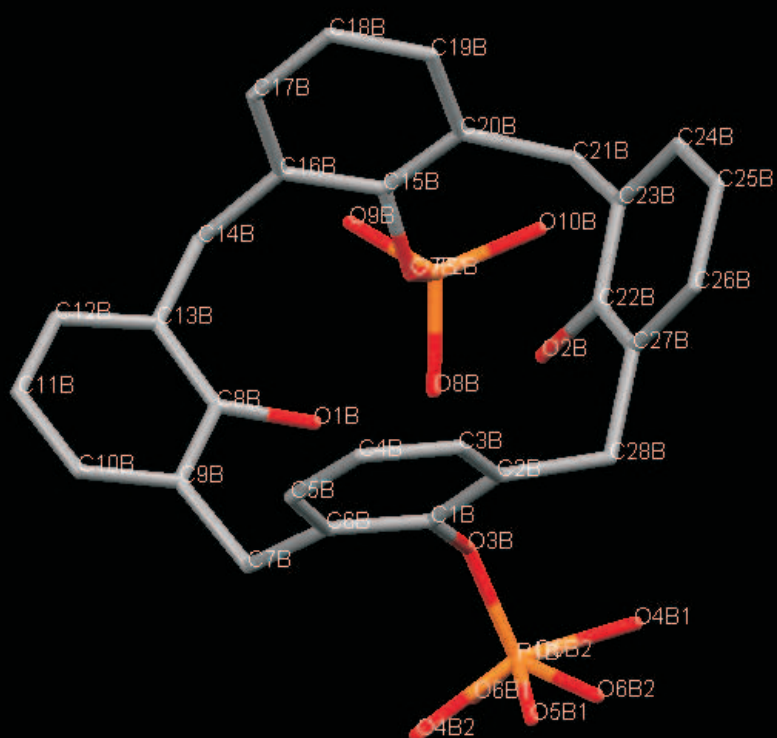

Supplement: b808568d.pdf [file b808568d.pdf]
